# Supplementary material for: Respiratory Syncytial Virus and US Pediatric Intensive Care Utilization
Source: PubMed Central journal article supplement (PMC11581606; doi:10.1001/jamanetworkopen.2024.40997), 2024-10-25
Supplement: jamanetwopen-e2440997-s001.pdf [file jamanetwopen-e2440997-s001.pdf]

## Supplemental Online Content

Shanklin A, Olson T, Patel AK, Trujillo Rivera EA, Pollack MM. Respiratory syncytial virus and United States pediatric intensive care utilization. *JAMA Netw Open*.

2024;7(10):e2440997. doi:10.1001/jamanetworkopen.2024.40997

**eTable 1.** Insurance Designations and Their Classification as Public, Private, or ‘Not Available’

**eTable 2.** ICD-10 Diagnosis Codes Used to Identify Acute or Unspecified Respiratory Failure

**eTable 3.** ICD-10 Procedure Codes Used to Identify Positive Pressure or Mechanical Ventilation

**eTable 4.** ICD-10 Clinical Events Used to Identify Noninvasive and Invasive Positive Pressure Ventilation

**eTable 5.** Medication Administration Drug IDs Used to Identify the Administration of a Vasoactive Medication

**eTable 6.** ICD-10 Procedure Codes Used to Identify ECMO

**eTable 7.** International Classification of Diseases, Tenth Revision (ICD-10) Codes Used To Identify High-Risk Conditions, Defined as Medical Conditions That Make Patients Eligible For Respiratory Syncytial Virus (RSV) Prevention in Their 2nd RSV Season per the CDC Recommendations

**eTable 8.** Hospital Type, Size, and Location of All Pediatric ICU Encounters Between January 1st, 2017, and December 31st, 2019, Stratified by RSV Infection

**eTable 9.** Seasonality of All Pediatric ICU Encounters Between January 1st, 2017, and December 31st, 2019, Stratified by Age

**eTable 10.** Demographics and Outcomes for All Pediatric ICU Encounters Between January 1st, 2017, and June 1st, 2023, Stratified by Age

**eTable 11.** Demographics and Outcomes for All Pediatric ICU Encounters With RSV Between January 1st, 2017, and June 1st, 2023, Stratified by Positive Pressure Ventilation and Age

**eFigure.** Number of Encounters in Each United States Zip Code Region

### eReferences

This supplemental material has been provided by the authors to give readers additional information about their work.

### Supplemental Methods

The primary insurer for each encounter was classified as ‘private,’ ‘public,’ or ‘other/unknown.’ Appendix Table 1 shows insurance designations and the number of patients who meet each description.

The illness severity of each encounter was determined by ICD-10 diagnosis codes, ICD-10 procedure codes, ‘clinical events’ or clinical documentation, and the medication administration record. Appendix Tables 2-6 list the specific CRWD codes and designations used for this classification. Respiratory failure was identified by the presence of an ICD-10 diagnosis code (Appendix Table 2). Noninvasive and/or invasive positive pressure ventilation were identified using procedure codes (Appendix Table 3) and/or clinical events (Appendix Table 4). Vasoactive medication administration was identified by the presence of a vasoactive medication in the medication administration record (Appendix Table 5). Extracorporeal membrane oxygenation (ECMO) was identified using ICD-10 procedure codes (Appendix Table 6).

All encounters were designated as ‘eligible for RSV prevention’ or ‘not eligible for RSV prevention,’ according to the CDC’s 2023 recommendations for nirsevimab and the maternal RSVpreF vaccine.<sup>2-6</sup> The CDC’s 2023 recommendations indicate that all infants should receive RSV prevention for their first RSV season and infants with a designated high-risk condition should receive RSV prevention for their second RSV season.<sup>2</sup> All encounters admitted under one year of age were considered eligible for RSV prevention. Encounters with a designated high-risk condition admitted under two years of age were also considered eligible for RSV prevention. All ICD-10 diagnosis codes representing these high-risk conditions were identified and classified. The complete list of ICD-10 codes and classifications is shown in Appendix Table 1.

**eTable 1:** Insurance designations, insurance classifications, and the number of encounters with each designation in the database.

| DATABASE Designation                                                               | Insurance Type | N     |
|------------------------------------------------------------------------------------|----------------|-------|
| MEDICAID                                                                           | Public         | 29490 |
| Medicaid (Managed Care)                                                            | Public         | 10453 |
| Medicaid HMO                                                                       | Public         | 9242  |
| OTHER GOVERNMENT<br>(Federal/State/Local) (excluding<br>Department of Corrections) | Public         | 4613  |
| TRICARE (CHAMPUS)                                                                  | Public         | 1979  |
| Medicaid - Out of State                                                            | Public         | 1196  |
| Medicaid Managed Care Other                                                        | Public         | 652   |
| MEDICARE                                                                           | Public         | 510   |
| Pending Medicaid coverage                                                          | Public         | 36    |
| Charity                                                                            | Public         | 14    |
| Department of Veterans Affairs                                                     | Public         | 7     |
| DEPARTMENTS OF CORRECTIONS                                                         | Public         | 3     |
| Medicare (Managed Care)                                                            | Public         | 2     |
| PRIVATE HEALTH INSURANCE                                                           | Private        | 16515 |
| BLUE CROSS/BLUE SHIELD                                                             | Private        | 7743  |
| Managed Care (Private)                                                             | Private        | 738   |
| BC Managed Care                                                                    | Private        | 666   |
| Foreign National                                                                   | Private        | 482   |

|                                             |                  |       |
|---------------------------------------------|------------------|-------|
| Other (Non-government)                      | Private          | 329   |
| Auto Insurance (no fault) 2217 BC Indemnity | Private          | 68    |
| Worker's Compensation                       | Private          | 39    |
| BC Managed Care - HMO                       | Private          | 16    |
| Research/Donor                              | Private          | 15    |
| NA                                          | Other or Unknown | 20297 |
| HMO                                         | Other or Unknown | 6471  |
| PPO                                         | Other or Unknown | 3285  |
| Self-pay                                    | Other or Unknown | 2472  |
| POS                                         | Other or Unknown | 95    |
| Exclusive Provider Organization             | Other or Unknown | 67    |
| Managed Care, Other (non HMO)               | Other or Unknown | 58    |
| MISCELLANEOUS/OTHER                         | Other or Unknown | 12    |

**eTable 2:** ICD-10 diagnosis codes used to identify acute or unspecified respiratory failure.

| Code ID | Primary Display                                                                        | ID Description |
|---------|----------------------------------------------------------------------------------------|----------------|
| J96.01  | acute respiratory failure with hypoxia                                                 | IC10           |
| J96.00  | acute respiratory failure, unspecified whether with hypoxia or hypercapnia             | IC10           |
| J96.21  | acute and chronic respiratory failure with hypoxia                                     | IC10           |
| J96.90  | respiratory failure, unspecified, unspecified whether with hypoxia or hypercapnia      | IC10           |
| J96.02  | acute respiratory failure with hypercapnia                                             | IC10           |
| J96.20  | acute and chronic respiratory failure, unspecified whether with hypoxia or hypercapnia | IC10           |
| J95.821 | acute postprocedural respiratory failure                                               | IC10           |
| J96.91  | respiratory failure, unspecified with hypoxia                                          | IC10           |
| J96.22  | acute and chronic respiratory failure with hypercapnia                                 | IC10           |
| J96.0   | acute respiratory failure                                                              | IC10           |
| J96.92  | respiratory failure, unspecified with hypercapnia                                      | IC10           |

**eTable 3:** ICD-10 Procedure codes used to identify positive pressure or mechanical ventilation

| Code ID | Primary Display                                                                                                 |
|---------|-----------------------------------------------------------------------------------------------------------------|
| 5A1955Z | respiratory ventilation, greater than 96 consecutive hours                                                      |
| 5A1945Z | respiratory ventilation, 24-96 consecutive hours                                                                |
| 5A1935Z | respiratory ventilation, less than 24 consecutive hours                                                         |
| 5A09357 | assistance with respiratory ventilation, less than 24 consecutive hours, continuous positive airway pressure    |
| 5A09457 | assistance with respiratory ventilation, 24-96 consecutive hours, continuous positive airway pressure           |
| 5A09557 | assistance with respiratory ventilation, greater than 96 consecutive hours, continuous positive airway pressure |
| 5A0945Z | assistance with respiratory ventilation, 24-96 consecutive hours                                                |

|         |                                                                                                                                                                                  |
|---------|----------------------------------------------------------------------------------------------------------------------------------------------------------------------------------|
| 5A0935Z | assistance with respiratory ventilation, less than 24 consecutive hours                                                                                                          |
| 5A0955Z | assistance with respiratory ventilation, greater than 96 consecutive hours                                                                                                       |
| 5A09358 | assistance with respiratory ventilation, less than 24 consecutive hours, intermittent positive airway pressure                                                                   |
| 5A09458 | assistance with respiratory ventilation, 24-96 consecutive hours, intermittent positive airway pressure                                                                          |
| 5A09558 | assistance with respiratory ventilation, greater than 96 consecutive hours, intermittent positive airway pressure                                                                |
| 94002   | ventilation assist and management, initiation of pressure or volume preset ventilators for assisted or controlled breathing; hospital inpatient/observation, initial day         |
| 94003   | ventilation assist and management, initiation of pressure or volume preset ventilators for assisted or controlled breathing; hospital inpatient/observation, each subsequent day |

**eTable 4:** ICD-10 Clinical events used to identify noninvasive and invasive positive pressure ventilation.

| ID       | Event Name                                                                            | Event Class |
|----------|---------------------------------------------------------------------------------------|-------------|
| 20077-4  | positive end expiratory pressure setting ventilator                                   | Other       |
| 33446-6  | airway temperature setting ventilator                                                 | Other       |
| 19840-8  | breath rate spontaneous and mechanical --on ventilator                                | Other       |
| 2.51E+08 | end tidal carbon dioxide concentration                                                | Other       |
| 20079-0  | pressure support setting ventilator                                                   | Other       |
| 19834-1  | breath rate setting ventilator                                                        | Other       |
| 19839-0  | breath rate spontaneous --on ventilator                                               | Other       |
| 20116-0  | tidal volume.spontaneous --on ventilator                                              | Other       |
| 20112-9  | tidal volume setting ventilator                                                       | Other       |
| 13621006 | tidal volume                                                                          | Other       |
| 38199-6  | intrinsic peep respiratory system                                                     | Other       |
| 19994-3  | oxygen/total gas setting volume fraction ventilator                                   | Other       |
| 58959-8  | bipap and/or cpap setting ventilator                                                  | Other       |
| 20058-4  | airway pressure ventilator --at peak inspiratory flow setting                         | Other       |
| 76007-4  | tidal volume expired respiratory system airway --on ventilator                        | Other       |
| 33438-3  | breath rate mechanical --on ventilator                                                | Other       |
| 19976-0  | maximum pressure respiratory system airway opening --during inspiration on ventilator | Other       |
| 76530-5  | mean pressure respiratory system airway --on ventilator                               | Other       |
| 60794-5  | inspiratory gas flow respiratory system airway --on ventilator                        | Other       |
| 20075-8  | peep respiratory system                                                               | Other       |
| 47545007 | continuous positive airway pressure ventilation treatment                             | Other       |
| 20057-6  | airway pressure ventilator --at peak inspiratory flow maximum setting                 | Other       |
| 20124-4  | ventilation mode ventilator                                                           | Other       |

**eTable 5:** Medication administration drug IDs used to identify the administration of a vasoactive medication.

| Coding System | Drug Code ID | Med Name      | Route       |
|---------------|--------------|---------------|-------------|
| 314           | d00704       | phenylephrine | Intravenous |
| 314           | d00699       | EPINEPHrine   | Intravenous |

|     |        |                                                           |                           |
|-----|--------|-----------------------------------------------------------|---------------------------|
| 314 | d00302 | milrinone                                                 | Intravenous               |
| 314 | d00216 | DOPamine                                                  | Intravenous               |
| 312 | 24063  | EPINEPHrine 0.1 mg/mL injectable solution                 | Intravenous               |
| 312 | 12424  | EPINEPHrine                                               | Intravenous               |
| 312 | 198542 | EPINEPHrine 10 mcg/mL-NaCl 0.9% intravenous solution      | Intravenous               |
| 314 | d00323 | norepinephrine                                            | Intravenous               |
| 314 | d00398 | vasopressin                                               | Intravenous               |
| 312 | 23409  | EPINEPHrine 1 mg/mL injectable solution                   | Intravenous               |
| 312 | 12216  | milrinone                                                 | Intravenous               |
| 312 | 23078  | milrinone 1 mg/mL intravenous solution                    | Intravenous               |
| 312 | 12429  | phenylephrine                                             | Intravenous               |
| 314 | d00215 | DOBUTamine                                                | Intravenous               |
| 312 | 24422  | phenylephrine 10 mg/mL injectable solution                | Intravenous               |
| 312 | 12146  | DOPamine                                                  | Intravenous               |
| 312 | 25671  | DOPamine 1.6 mg/mL-D5% intravenous solution               | Intravenous               |
| 312 | 12145  | DOBUTamine                                                | Intravenous               |
| 312 | 12296  | vasopressin                                               | Intravenous               |
| 312 | 25672  | DOPamine 3.2 mg/mL-D5% intravenous solution               | Intravenous               |
| 312 | 25698  | milrinone 200 mcg/mL-D5% intravenous solution             | Intravenous               |
| 312 | 24736  | norepinephrine 1 mg/mL intravenous solution               | Intravenous               |
| 314 | d00704 | phenylephrine                                             | Intravenous central route |
| 312 | 12232  | norepinephrine                                            | Intravenous               |
| 312 | 23510  | vasopressin 20 units/mL injectable solution               | Intravenous               |
| 312 | 194335 | phenylephrine 100 mcg/mL-NaCl 0.9% intravenous solution   | Intravenous               |
| 312 | 26302  | DOBUTamine 1 mg/mL-D5% intravenous solution               | Intravenous               |
| 312 | 194333 | phenylephrine 20 mg/250 mL-NaCl 0.9% intravenous solution | Intravenous               |
| 314 | d00302 | milrinone                                                 | Intravenous central route |
| 312 | 147616 | phenylephrine 1 mg/10 mL-NaCl 0.9% intravenous solution   | Intravenous               |
| 312 | 25345  | DOPamine 800 mcg/mL-D5% intravenous solution              | Intravenous               |
| 312 | 26303  | DOBUTamine 2 mg/mL-D5% intravenous solution               | Intravenous               |
| 314 | d00704 | phenylephrine                                             | Intravenous central       |
| 312 | 26304  | DOBUTamine 4 mg/mL-D5% intravenous solution               | Intravenous               |
| 314 | d00302 | milrinone                                                 | Intravenous central       |

**eTable 6:** ICD-10 procedure codes used to identify ECMO.

| Code ID | Tag  | Primary Display                                                |
|---------|------|----------------------------------------------------------------|
| 5A1522G | ECMO | extracorporeal oxygenation, membrane, peripheral veno-arterial |
| 5A1522H | ECMO | extracorporeal oxygenation, membrane, peripheral veno-venous   |
| 5A15223 | ECMO | extracorporeal membrane oxygenation, continuous                |
| 5A1522F | ECMO | extracorporeal oxygenation, membrane, central                  |

|          |      |                                                                                                                                                                                                                                                             |
|----------|------|-------------------------------------------------------------------------------------------------------------------------------------------------------------------------------------------------------------------------------------------------------------|
| 33953    | ECMO | extracorporeal membrane oxygenation (ecmo)/extracorporeal life support (ecls) provided by physician; insertion of peripheral (arterial and/or venous) cannula(e), open, birth through 5 years of age                                                        |
| 33947    | ECMO | extracorporeal membrane oxygenation (ecmo)/extracorporeal life support (ecls) provided by physician; initiation, veno-arterial                                                                                                                              |
| 33969    | ECMO | extracorporeal membrane oxygenation (ecmo)/extracorporeal life support (ecls) provided by physician; removal of peripheral (arterial and/or venous) cannula(e), open, birth through 5 years of age                                                          |
| 33955    | ECMO | extracorporeal membrane oxygenation (ecmo)/extracorporeal life support (ecls) provided by physician; insertion of central cannula(e) by sternotomy or thoracotomy, birth through 5 years of age                                                             |
| 33985    | ECMO | extracorporeal membrane oxygenation (ecmo)/extracorporeal life support (ecls) provided by physician; removal of central cannula(e) by sternotomy or thoracotomy, birth through 5 years of age                                                               |
| 33954    | ECMO | extracorporeal membrane oxygenation (ecmo)/extracorporeal life support (ecls) provided by physician; insertion of peripheral (arterial and/or venous) cannula(e), open, 6 years and older                                                                   |
| 2.33E+08 | ECMO | cardiac support using extracorporeal membrane oxygenation circuitry                                                                                                                                                                                         |
| 33946    | ECMO | extracorporeal membrane oxygenation (ecmo)/extracorporeal life support (ecls) provided by physician; initiation, veno-venous                                                                                                                                |
| 33984    | ECMO | extracorporeal membrane oxygenation (ecmo)/extracorporeal life support (ecls) provided by physician; removal of peripheral (arterial and/or venous) cannula(e), open, 6 years and older                                                                     |
| 33949    | ECMO | extracorporeal membrane oxygenation (ecmo)/extracorporeal life support (ecls) provided by physician; daily management, each day, veno-arterial                                                                                                              |
| 2.34E+08 | ECMO | extracorporeal membrane oxygenation                                                                                                                                                                                                                         |
| 33952    | ECMO | extracorporeal membrane oxygenation (ecmo)/extracorporeal life support (ecls) provided by physician; insertion of peripheral (arterial and/or venous) cannula(e), percutaneous, 6 years and older (includes fluoroscopic guidance, when performed)          |
| 33959    | ECMO | extracorporeal membrane oxygenation (ecmo)/extracorporeal life support (ecls) provided by physician; reposition peripheral (arterial and/or venous) cannula(e), open, birth through 5 years of age (includes fluoroscopic guidance, when performed)         |
| 33956    | ECMO | extracorporeal membrane oxygenation (ecmo)/extracorporeal life support (ecls) provided by physician; insertion of central cannula(e) by sternotomy or thoracotomy, 6 years and older                                                                        |
| 33966    | ECMO | extracorporeal membrane oxygenation (ecmo)/extracorporeal life support (ecls) provided by physician; removal of peripheral (arterial and/or venous) cannula(e), percutaneous, 6 years and older                                                             |
| 5A15A2F  | ECMO | extracorporeal oxygenation, membrane, central, intraoperative                                                                                                                                                                                               |
| 33957    | ECMO | extracorporeal membrane oxygenation (ecmo)/extracorporeal life support (ecls) provided by physician; reposition peripheral (arterial and/or venous) cannula(e), percutaneous, birth through 5 years of age (includes fluoroscopic guidance, when performed) |

|          |      |                                                                                                                                                                                                                                                               |
|----------|------|---------------------------------------------------------------------------------------------------------------------------------------------------------------------------------------------------------------------------------------------------------------|
| 33963    | ECMO | extracorporeal membrane oxygenation (ecmo)/extracorporeal life support (ecls) provided by physician; reposition of central cannula(e) by sternotomy or thoracotomy, birth through 5 years of age (includes fluoroscopic guidance, when performed)             |
| 33981    | ECMO | replacement of extracorporeal ventricular assist device, single or biventricular, pump(s), single or each pump                                                                                                                                                |
| 33986    | ECMO | extracorporeal membrane oxygenation (ecmo)/extracorporeal life support (ecls) provided by physician; removal of central cannula(e) by sternotomy or thoracotomy, 6 years and older                                                                            |
| 24376003 | ECMO | extracorporeal shockwave lithotripsy of the kidney                                                                                                                                                                                                            |
| 33951    | ECMO | extracorporeal membrane oxygenation (ecmo)/extracorporeal life support (ecls) provided by physician; insertion of peripheral (arterial and/or venous) cannula(e), percutaneous, birth through 5 years of age (includes fluoroscopic guidance, when performed) |
| 33962    | ECMO | extracorporeal membrane oxygenation (ecmo)/extracorporeal life support (ecls) provided by physician; reposition peripheral (arterial and/or venous) cannula(e), open, 6 years and older (includes fluoroscopic guidance, when performed)                      |
| 33977    | ECMO | removal of ventricular assist device; extracorporeal, single ventricle                                                                                                                                                                                        |
| 5A15A2G  | ECMO | extracorporeal oxygenation, membrane, peripheral veno-arterial, intraoperative                                                                                                                                                                                |
| 5A15A2H  | ECMO | extracorporeal oxygenation, membrane, peripheral veno-venous, intraoperative                                                                                                                                                                                  |

**eTable 7:** ICD-10 code and diagnosis for each condition that identifies an encounter as eligible for RSV protection during their 2nd RSV season.<sup>1,2</sup>

| ICD-10 Code | Diagnosis Description                                                        | Diagnosis Class                                     |
|-------------|------------------------------------------------------------------------------|-----------------------------------------------------|
| P27.8       | Other chronic respiratory diseases originating in the perinatal period       | Chronic respiratory disease in the perinatal period |
| J96.10      | Chronic respiratory failure, unspecified whether with hypoxia or hypercapnia | Chronic respiratory failure                         |
| J96.12      | Chronic respiratory failure with hypercapnia                                 | Chronic respiratory failure                         |
| J96.11      | Chronic respiratory failure with hypoxia                                     | Chronic respiratory failure                         |
| J96.1       | Chronic respiratory failure                                                  | Chronic respiratory failure                         |
| Q20.0       | Common arterial trunk                                                        | Congenital heart disease                            |
| Q21.0       | Ventricular septal defect                                                    | Congenital heart disease                            |
| Q21.1       | Atrial septal defect                                                         | Congenital heart disease                            |
| Q21.3       | Tetralogy of Fallot                                                          | Congenital heart disease                            |
| Q27.8       | Other specified congenital malformations of peripheral vascular system       | Congenital heart disease                            |
| Q23.1       | Congenital insufficiency of aortic valve                                     | Congenital heart disease                            |
| Q23.0       | Congenital stenosis of aortic valve                                          | Congenital heart disease                            |
| Q24.4       | Congenital subaortic stenosis                                                | Congenital heart disease                            |
| Q25.0       | Patent ductus arteriosus                                                     | Congenital heart disease                            |
| Q21.12      | Patent foramen ovale                                                         | Congenital heart disease                            |
| Q23.4       | Hypoplastic left heart syndrome                                              | Congenital heart disease                            |
| Q20.4       | Double inlet ventricle                                                       | Congenital heart disease                            |
| Q22.0       | Pulmonary valve atresia                                                      | Congenital heart disease                            |
| Q25.5       | Atresia of pulmonary artery                                                  | Congenital heart disease                            |
| Q24.5       | Malformation of coronary vessels                                             | Congenital heart disease                            |
| Q25.6       | Stenosis of pulmonary artery                                                 | Congenital heart disease                            |
| Q21.10      | Atrial septal defect, unspecified                                            | Congenital heart disease                            |
| Q21.19      | Other specified atrial septal defect                                         | Congenital heart disease                            |

|        |                                                                       |                          |
|--------|-----------------------------------------------------------------------|--------------------------|
| Q25.1  | Coarctation of aorta                                                  | Congenital heart disease |
| Q24.9  | Congenital malformation of heart, unspecified                         | Congenital heart disease |
| Q25.42 | Hypoplasia of aorta                                                   | Congenital heart disease |
| Q20.1  | Double outlet right ventricle                                         | Congenital heart disease |
| Q25.21 | Interruption of aortic arch                                           | Congenital heart disease |
| Q24.3  | Pulmonary infundibular stenosis                                       | Congenital heart disease |
| Q27.39 | Arteriovenous malformation, other site                                | Congenital heart disease |
| Q26.2  | Total anomalous pulmonary venous connection                           | Congenital heart disease |
| Q20.3  | Discordant ventriculoarterial connection                              | Congenital heart disease |
| Q25.49 | Other congenital malformations of aorta                               | Congenital heart disease |
| Q22.4  | Congenital tricuspid stenosis                                         | Congenital heart disease |
| Q24.8  | Other specified congenital malformations of heart                     | Congenital heart disease |
| Q25.79 | Other congenital malformations of pulmonary artery                    | Congenital heart disease |
| Q21.2  | Atrioventricular septal defect                                        | Congenital heart disease |
| Q22.5  | Ebstein's anomaly                                                     | Congenital heart disease |
| Q20.8  | Other congenital malformations of cardiac chambers and connections    | Congenital heart disease |
| Q26.8  | Other congenital malformations of great veins                         | Congenital heart disease |
| Q26.1  | Persistent left superior vena cava                                    | Congenital heart disease |
| Q20.6  | Isomerism of atrial appendages                                        | Congenital heart disease |
| Q28.2  | Arteriovenous malformation of cerebral vessels                        | Congenital heart disease |
| Q27.30 | Arteriovenous malformation, site unspecified                          | Congenital heart disease |
| Q26.3  | Partial anomalous pulmonary venous connection                         | Congenital heart disease |
| Q27.9  | Congenital malformation of peripheral vascular system, unspecified    | Congenital heart disease |
| Q24.0  | Dextrocardia                                                          | Congenital heart disease |
| Q25.45 | Double aortic arch                                                    | Congenital heart disease |
| Q25.47 | Right aortic arch                                                     | Congenital heart disease |
| Q21.11 | Secundum atrial septal defect                                         | Congenital heart disease |
| Q23.3  | Congenital mitral insufficiency                                       | Congenital heart disease |
| Q23.2  | Congenital mitral stenosis                                            | Congenital heart disease |
| Q25.48 | Anomalous origin of subclavian artery                                 | Congenital heart disease |
| Q22.6  | Hypoplastic right heart syndrome                                      | Congenital heart disease |
| Q22.8  | Other congenital malformations of tricuspid valve                     | Congenital heart disease |
| Q23.8  | Other congenital malformations of aortic and mitral valves            | Congenital heart disease |
| Q26.9  | Congenital malformation of great vein, unspecified                    | Congenital heart disease |
| Q24.1  | Levocardia                                                            | Congenital heart disease |
| Q24.6  | Congenital heart block                                                | Congenital heart disease |
| Q22.1  | Congenital pulmonary valve stenosis                                   | Congenital heart disease |
| Q23.9  | Congenital malformation of aortic and mitral valves, unspecified      | Congenital heart disease |
| Q28.3  | Other malformations of cerebral vessels                               | Congenital heart disease |
| Q21.15 | Inferior sinus venosus atrial septal defect                           | Congenital heart disease |
| Q21.16 | Sinus venosus atrial septal defect, unspecified                       | Congenital heart disease |
| Q20.2  | Double outlet left ventricle                                          | Congenital heart disease |
| Q20.5  | Discordant atrioventricular connection                                | Congenital heart disease |
| Q25.4  | Other congenital malformations of aorta                               | Congenital heart disease |
| Q24.2  | Cor triatriatum                                                       | Congenital heart disease |
| Q28.9  | Congenital malformation of circulatory system, unspecified            | Congenital heart disease |
| Q21.20 | Atrioventricular septal defect, unspecified as to partial or complete | Congenital heart disease |
| Q25.8  | Other congenital malformations of other great arteries                | Congenital heart disease |



|         |                                                                          |                          |
|---------|--------------------------------------------------------------------------|--------------------------|
| Q25.29  | Other atresia of aorta                                                   | Congenital heart disease |
| Q25.72  | Congenital pulmonary arteriovenous malformation                          | Congenital heart disease |
| Q27.1   | Congenital renal artery stenosis                                         | Congenital heart disease |
| Q22.9   | Congenital malformation of tricuspid valve, unspecified                  | Congenital heart disease |
| Q25.40  | Congenital malformation of aorta unspecified                             | Congenital heart disease |
| Q22.3   | Other congenital malformations of pulmonary valve                        | Congenital heart disease |
| Q25.43  | Congenital aneurysm of aorta                                             | Congenital heart disease |
| Q26.4   | Anomalous pulmonary venous connection, unspecified                       | Congenital heart disease |
| Q21.23  | Complete atrioventricular septal defect                                  | Congenital heart disease |
| Q25.3   | Supravalvular aortic stenosis                                            | Congenital heart disease |
| Q28.8   | Other specified congenital malformations of circulatory system           | Congenital heart disease |
| Q25.9   | Congenital malformation of great arteries, unspecified                   | Congenital heart disease |
| Q26.0   | Congenital stenosis of vena cava                                         | Congenital heart disease |
| Q25.44  | Congenital dilation of aorta                                             | Congenital heart disease |
| Q28.1   | Other malformations of precerebral vessels                               | Congenital heart disease |
| Q22.2   | Congenital pulmonary valve insufficiency                                 | Congenital heart disease |
| Q21.8   | Other congenital malformations of cardiac septa                          | Congenital heart disease |
| Q21.13  | Coronary sinus atrial septal defect                                      | Congenital heart disease |
| Q21.22  | Transitional atrioventricular septal defect                              | Congenital heart disease |
| Q21.9   | Congenital malformation of cardiac septum, unspecified                   | Congenital heart disease |
| Q21.4   | Aortopulmonary septal defect                                             | Congenital heart disease |
| Q27.0   | Congenital absence and hypoplasia of umbilical artery                    | Congenital heart disease |
| Q20.9   | Congenital malformation of cardiac chambers and connections, unspecified | Congenital heart disease |
| Q27.32  | Arteriovenous malformation of vessel of lower limb                       | Congenital heart disease |
| Q26.5   | Anomalous portal venous connection                                       | Congenital heart disease |
| Q25.46  | Tortuous aortic arch                                                     | Congenital heart disease |
| Q27.2   | Other congenital malformations of renal artery                           | Congenital heart disease |
| Q21.14  | Superior sinus venosus atrial septal defect                              | Congenital heart disease |
| Q24     | Other congenital malformations of heart                                  | Congenital heart disease |
| Q25.2   | Atresia of aorta                                                         | Congenital heart disease |
| Q27.33  | Arteriovenous malformation of digestive system vessel                    | Congenital heart disease |
| Q28.0   | Arteriovenous malformation of precerebral vessels                        | Congenital heart disease |
| Q25.71  | Coarctation of pulmonary artery                                          | Congenital heart disease |
| Q21.21  | Partial atrioventricular septal defect                                   | Congenital heart disease |
| Q26.6   | Portal vein-hepatic artery fistula                                       | Congenital heart disease |
| E84.0   | Cystic fibrosis with pulmonary manifestations                            | Cystic fibrosis          |
| E84.9   | Cystic fibrosis, unspecified                                             | Cystic fibrosis          |
| E84.19  | Cystic fibrosis with other intestinal manifestations                     | Cystic fibrosis          |
| E84.8   | Cystic fibrosis with other manifestations                                | Cystic fibrosis          |
| E84.11  | Meconium ileus in cystic fibrosis                                        | Cystic fibrosis          |
| D84.9   | Immunodeficiency, unspecified                                            | Immunodeficiency         |
| D82.1   | Di George's syndrome                                                     | Immunodeficiency         |
| D80.2   | Selective deficiency of immunoglobulin A IgA                             | Immunodeficiency         |
| D82.8   | Immunodeficiency associated with other specified major defects           | Immunodeficiency         |
| D80.1   | Nonfamilial hypogammaglobulinemia                                        | Immunodeficiency         |
| D84.821 | Immunodeficiency due to drugs                                            | Immunodeficiency         |
| D89.810 | Acute graft-versus-host disease                                          | Immunodeficiency         |
| D81.5   | Purine nucleoside phosphorylase PNP deficiency                           | Immunodeficiency         |
| D89.9   | Disorder involving the immune mechanism, unspecified                     | Immunodeficiency         |
| D89.82  | Autoimmune lymphoproliferative syndrome ALPS                             | Immunodeficiency         |
| D84.89  | Other immunodeficiencies                                                 | Immunodeficiency         |

|         |                                                                                      |                  |
|---------|--------------------------------------------------------------------------------------|------------------|
| D81.810 | Biotinidase deficiency                                                               | Immunodeficiency |
| D83.1   | Common variable immunodeficiency with predominant immunoregulatory T-cell disorders  | Immunodeficiency |
| D81.1   | Severe combined immunodeficiency SCID with low T- and B-cell numbers                 | Immunodeficiency |
| D89.89  | Other specified disorders involving the immune mechanism, not elsewhere classified   | Immunodeficiency |
| D81.9   | Combined immunodeficiency, unspecified                                               | Immunodeficiency |
| D84.81  | Immunodeficiency due to conditions classified elsewhere                              | Immunodeficiency |
| D89.813 | Graft-versus-host disease, unspecified                                               | Immunodeficiency |
| D84.8   | Other specified immunodeficiencies                                                   | Immunodeficiency |
| D89.811 | Chronic graft-versus-host disease                                                    | Immunodeficiency |
| D80.3   | Selective deficiency of immunoglobulin G IgG subclasses                              | Immunodeficiency |
| D80.8   | Other immunodeficiencies with predominantly antibody defects                         | Immunodeficiency |
| D89.40  | Mast cell activation, unspecified                                                    | Immunodeficiency |
| D84.1   | Defects in the complement system                                                     | Immunodeficiency |
| D89.839 | Cytokine release syndrome, grade unspecified                                         | Immunodeficiency |
| D82.4   | Hyperimmunoglobulin E IgE syndrome                                                   | Immunodeficiency |
| D81.32  | Adenosine deaminase 2 deficiency                                                     | Immunodeficiency |
| D83.9   | Common variable immunodeficiency, unspecified                                        | Immunodeficiency |
| D80.7   | Transient hypogammaglobulinemia of infancy                                           | Immunodeficiency |
| D80.9   | Immunodeficiency with predominantly antibody defects, unspecified                    | Immunodeficiency |
| D81.39  | Other adenosine deaminase deficiency                                                 | Immunodeficiency |
| D81.2   | Severe combined immunodeficiency SCID with low or normal B-cell numbers              | Immunodeficiency |
| D89.44  | Hereditary alpha tryptasemia                                                         | Immunodeficiency |
| D84.822 | Immunodeficiency due to external causes                                              | Immunodeficiency |
| D89.2   | Hypergammaglobulinemia, unspecified                                                  | Immunodeficiency |
| D82.0   | Wiskott-Aldrich syndrome                                                             | Immunodeficiency |
| D81.89  | Other combined immunodeficiencies                                                    | Immunodeficiency |
| D82.2   | Immunodeficiency with short-limbed stature                                           | Immunodeficiency |
| D80.0   | Hereditary hypogammaglobulinemia                                                     | Immunodeficiency |
| D89.832 | Cytokine release syndrome, grade 2                                                   | Immunodeficiency |
| D89.831 | Cytokine release syndrome, grade 1                                                   | Immunodeficiency |
| D89.834 | Cytokine release syndrome, grade 4                                                   | Immunodeficiency |
| D81.7   | Major histocompatibility complex class II deficiency                                 | Immunodeficiency |
| D81.6   | Major histocompatibility complex class I deficiency                                  | Immunodeficiency |
| D80.4   | Selective deficiency of immunoglobulin M IgM                                         | Immunodeficiency |
| D89.812 | Acute on chronic graft-versus-host disease                                           | Immunodeficiency |
| D89.49  | Other mast cell activation disorder                                                  | Immunodeficiency |
| D89.42  | Idiopathic mast cell activation syndrome                                             | Immunodeficiency |
| D89.83  | Cytokine release syndrome                                                            | Immunodeficiency |
| D80.6   | Antibody deficiency with near-normal immunoglobulins or with hyperimmunoglobulinemia | Immunodeficiency |
| D89.833 | Cytokine release syndrome, grade 3                                                   | Immunodeficiency |
| D89.835 | Cytokine release syndrome, grade 5                                                   | Immunodeficiency |
| D82.3   | Immunodeficiency following hereditary defective response to Epstein-Barr virus       | Immunodeficiency |
| D81.30  | Adenosine deaminase deficiency, unspecified                                          | Immunodeficiency |
| D81.31  | Severe combined immunodeficiency due to adenosine deaminase deficiency               | Immunodeficiency |
| D81.818 | Other biotin-dependent carboxylase deficiency                                        | Immunodeficiency |

|         |                                                                             |                         |
|---------|-----------------------------------------------------------------------------|-------------------------|
| G71.00  | Muscular dystrophy, unspecified                                             | Muscular dystrophy      |
| G71.0   | Muscular dystrophy                                                          | Muscular dystrophy      |
| G71.01  | Duchenne or Becker muscular dystrophy                                       | Muscular dystrophy      |
| G71.09  | Other specified muscular dystrophies                                        | Muscular dystrophy      |
| G71.039 | Limb girdle muscular dystrophy, unspecified                                 | Muscular dystrophy      |
| M41.40  | Neuromuscular scoliosis, site unspecified                                   | Neuromuscular scoliosis |
| M41.44  | Neuromuscular scoliosis, thoracic region                                    | Neuromuscular scoliosis |
| M41.47  | Neuromuscular scoliosis, lumbosacral region                                 | Neuromuscular scoliosis |
| M41.45  | Neuromuscular scoliosis, thoracolumbar region                               | Neuromuscular scoliosis |
| M41.46  | Neuromuscular scoliosis, lumbar region                                      | Neuromuscular scoliosis |
| M41.4   | Neuromuscular scoliosis                                                     | Neuromuscular scoliosis |
| M41.43  | Neuromuscular scoliosis, cervicothoracic region                             | Neuromuscular scoliosis |
| P07.15  | Other low birth weight newborn, 1250-1499 grams                             | Prematurity             |
| P07.36  | Preterm newborn, gestational age 33 completed weeks                         | Prematurity             |
| P07.35  | Preterm newborn, gestational age 32 completed weeks                         | Prematurity             |
| P07.39  | Preterm newborn, gestational age 36 completed weeks                         | Prematurity             |
| P07.38  | Preterm newborn, gestational age 35 completed weeks                         | Prematurity             |
| P07.32  | Preterm newborn, gestational age 29 completed weeks                         | Prematurity             |
| P07.30  | Preterm newborn, unspecified weeks of gestation                             | Prematurity             |
| P07.22  | Extreme immaturity of newborn, gestational age 23 completed weeks           | Prematurity             |
| P07.26  | Extreme immaturity of newborn, gestational age 27 completed weeks           | Prematurity             |
| P07.24  | Extreme immaturity of newborn, gestational age 25 completed weeks           | Prematurity             |
| P07.23  | Extreme immaturity of newborn, gestational age 24 completed weeks           | Prematurity             |
| P07.37  | Preterm newborn, gestational age 34 completed weeks                         | Prematurity             |
| P07.16  | Other low birth weight newborn, 1500-1749 grams                             | Prematurity             |
| P07.14  | Other low birth weight newborn, 1000-1249 grams                             | Prematurity             |
| P07.25  | Extreme immaturity of newborn, gestational age 26 completed weeks           | Prematurity             |
| P07.17  | Other low birth weight newborn, 1750-1999 grams                             | Prematurity             |
| P07.33  | Preterm newborn, gestational age 30 completed weeks                         | Prematurity             |
| P07.31  | Preterm newborn, gestational age 28 completed weeks                         | Prematurity             |
| P07.20  | Extreme immaturity of newborn, unspecified weeks of gestation               | Prematurity             |
| P07.21  | Extreme immaturity of newborn, gestational age less than 23 completed weeks | Prematurity             |
| P07.34  | Preterm newborn, gestational age 31 completed weeks                         | Prematurity             |
| P07.18  | Other low birth weight newborn, 2000-2499 grams                             | Prematurity             |
| P07.10  | Other low birth weight newborn, unspecified weight                          | Prematurity             |

### Supplemental Results

For each encounter, the hospital type, size, and location were documented. Hospital type and size were designated by the database. Hospital location was described using the first digit of its US zip code. Appendix Table 8 shows the number of encounters in each hospital size, type, and location, stratified by the presence or absence of an RSV infection. Appendix Figure 1 (eFigure 1) shows the number of encounters in each physical location.

Encounter demographics and outcomes were also stratified by age. Appendix Table 9 shows the seasonality of all pediatric ICU admissions from January 2017 to December 2019, with encounters categorized as 0-2 years on admission, 2-5 years on admission, and >5 years on admission. Appendix Table 10 shows the demographics and outcomes of all ICU admissions from 2017 to June 2023, stratified in the same age groups. Lastly, Appendix Table 11 shows demographics and outcomes for all ICU encounters with RSV stratified by the receipt of positive pressure ventilation and age. This table used the following age groups: 0-1 years on admission, 1-2 years on admission, 2-5 years on admission, and >5 years on admission.

**eTable 8:** Hospital Type, Size, and Location of all Pediatric ICU Encounters between January 1st, 2017, and December 31st, 2019, Stratified by RSV Infection

| Demographics (N, %)                | Total (119,782) | RSV (13,702, 11.4%) | No RSV (106,080, 88.6%) |
|------------------------------------|-----------------|---------------------|-------------------------|
| <b>Hospital Type N (%)</b>         |                 |                     |                         |
| Academic                           | 22408 (18.71%)  | 3292 (24.03%)       | 19116 (18.02%)          |
| Acute Care or Critical Access      | 4567 (3.81%)    | 176 (1.28%)         | 4391 (4.14%)            |
| Children's                         | 61512 (51.35%)  | 7118 (51.95%)       | 54394 (51.28%)          |
| Health System                      | 31295 (26.13%)  | 3116 (22.74 %)      | 28179 (26.56%)          |
| <b>Hospital Size N (%)</b>         |                 |                     |                         |
| <200 beds                          | 183 (0.15%)     | 16 (0.12%)          | 167 (0.16%)             |
| 200-299 beds                       | 49830 (41.60%)  | 6334 (46.23%)       | 43496 (41.00%)          |
| 300-399 beds                       | 26828 (22.40%)  | 1496 (10.92%)       | 25332 (23.88%)          |
| > 500-beds                         | 42941 (35.85%)  | 5856 (42.74%)       | 37085 (34.96%)          |
| <b>1st Digit of Zip Code N (%)</b> |                 |                     |                         |
| 0                                  | 10843 (9.1%)    | 1304 (9.5%)         | 9539 (9.0%)             |
| 1                                  | 38 (0.0%)       | 0 (0.0%)            | 38 (0.0%)               |
| 2                                  | 19740 (16.5%)   | 3831 (28.0%)        | 15909 (15.0%)           |
| 3                                  | 22154 (18.5%)   | 2153 (15.7%)        | 20001 (18.9%)           |
| 4                                  | 36 (0.0%)       | 0 (0.0%)            | 36 (0.0%)               |
| 5                                  | 222 (0.2%)      | 4 (0.0%)            | 218 (0.2%)              |
| 6                                  | 16995 (14.2%)   | 503 (3.7%)          | 16492 (15.6%)           |
| 7                                  | 16988 (14.2%)   | 902 (6.6%)          | 16086 (15.16%)          |
| 8                                  | 16012 (13.4%)   | 3525 (25.7%)        | 12487 (11.77%)          |
| 9                                  | 16754 (14.0%)   | 1480 (10.8%)        | 15274 (14.4%)           |

**eTable 9:** Seasonality of all Pediatric ICU Encounters between January 1<sup>st</sup>, 2017, and December 31<sup>st</sup>, 2019, Stratified by Age

a. Encounters admitted from 2017-2019 were used to represent the RSV season and the RSV peak to minimize alteration by the COVID-19 pandemic.<sup>7</sup>

b. North American RSV season is defined as October-April. The peak is defined as December-January.<sup>8</sup>

| Variables                             | 0-2 years on admission<br>N (% age group) |                  |                   | 2-5 years on admission<br>N (% age group) |                  |                  | 2-5 years on admission<br>N (% age group) |                  |                   |
|---------------------------------------|-------------------------------------------|------------------|-------------------|-------------------------------------------|------------------|------------------|-------------------------------------------|------------------|-------------------|
|                                       | Total                                     | RSV              | No RSV            | Total                                     | RSV              | No RSV           | Total                                     | RSV              | No RSV            |
| <b>All ICU Encounters<sup>a</sup></b> |                                           |                  |                   |                                           |                  |                  |                                           |                  |                   |
| Encounters                            | 21620<br>(100%)                           | 3595<br>(16.6%)  | 18025<br>(83.4%)  | 9651<br>(100%)                            | 1024<br>(10.6%)  | 8627<br>(89.4%)  | 27631<br>(100%)                           | 1326<br>(4.8%)   | 26305<br>(95.2%)  |
| ICU days, sum (% total)               | 112889<br>(100%)                          | 27620<br>(24.5%) | 85269<br>(75.5%)  | 36150<br>(100%)                           | 7107<br>(19.7%)  | 29043<br>(80.3%) | 95347<br>(100%)                           | 13091<br>(13.7%) | 82256<br>(86.3%)  |
| Hospital days, sum (% total)          | 183806<br>(100%)                          | 44172<br>(24.0%) | 139635<br>(76.0%) | 66727<br>(100%)                           | 12713<br>(19.1%) | 54014<br>(81.0%) | 191337<br>(100%)                          | 24361<br>(12.7%) | 166977<br>(87.3%) |
| <b>RSV Season<sup>b</sup></b>         |                                           |                  |                   |                                           |                  |                  |                                           |                  |                   |
| Encounters                            | 14507<br>(100%)                           | 2771<br>(19.1%)  | 11736<br>(80.9%)  | 5782<br>(100%)                            | 760<br>(13.1%)   | 5022<br>(86.9%)  | 15963<br>(100%)                           | 901<br>(5.6%)    | 15062<br>(94.4%)  |
| ICU Days, sum (% total)               | 71012<br>(100%)                           | 18174<br>(25.6%) | 52839<br>(74.4%)  | 21627<br>(100%)                           | 4923<br>(22.8%)  | 16704<br>(77.2%) | 57127<br>(100%)                           | 8528<br>(14.9%)  | 48599<br>(85.1%)  |
| Hospital days, sum (% total)          | 118397<br>(100%)                          | 30659<br>(25.9%) | 87738<br>(74.1%)  | 39907<br>(100%)                           | 8573<br>(21.5%)  | 31333<br>(78.5%) | 112221<br>(100%)                          | 15448<br>(13.8%) | 96774<br>(86.2%)  |
| <b>RSV Peak<sup>b</sup></b>           |                                           |                  |                   |                                           |                  |                  |                                           |                  |                   |
| Encounters                            | 4777<br>(100%)                            | 1059<br>(22.2%)  | 3718<br>(77.8%)   | 1781<br>(100%)                            | 287<br>(16.1%)   | 1494<br>(83.9%)  | 4471<br>(100%)                            | 272<br>(6.1%)    | 4199<br>(93.9%)   |
| ICU days, sum (% total)               | 23804<br>(100%)                           | 7174<br>(30.1%)  | 16630<br>(69.9%)  | 6602<br>(100%)                            | 1665<br>(25.2%)  | 4937<br>(74.8%)  | 15143<br>(100%)                           | 2358<br>(15.6%)  | 12786<br>(84.4%)  |
| Hospital days, sum (% total)          | 38924<br>(100%)                           | 11660<br>(30.0%) | 27264<br>(70.1%)  | 12318<br>(100%)                           | 2813<br>(22.8%)  | 9505<br>(77.2%)  | 31466<br>(100%)                           | 4428<br>(14.1%)  | 27038<br>(85.9%)  |

**eTable 10:** Demographics and Outcomes for all Pediatric ICU Encounters between January 1st, 2017, and June 1st, 2023, Stratified by Age

- a. RSV and non-RSV encounter characteristics were compared using two-tailed Pearson's  $\chi^2$  tests for categorical variables and two-tailed Wilcoxon rank-sum tests for continuous variables.
- b. Primary, public, and unknown insurance types were compared with post-hoc analysis. Public insurance was the reference group.
- c. Positive pressure ventilation includes both invasive and non-invasive ventilation.
- d. High-risk conditions were identified by ICD codes selected based on CDC's recommendations for nirsevimab administration.<sup>2</sup>

| 15                                              |                       | 0-2 years on admission<br>N (% age group) |                        |                             |                          | 2-5 years on admission<br>N (% age group) |                         |                               |                          | >5 years on admission<br>N (% age group) |                         |                               |                          |
|-------------------------------------------------|-----------------------|-------------------------------------------|------------------------|-----------------------------|--------------------------|-------------------------------------------|-------------------------|-------------------------------|--------------------------|------------------------------------------|-------------------------|-------------------------------|--------------------------|
|                                                 | Variables             | Total<br>42387<br>(100%)                  | RSV<br>7212<br>(17.2%) | No<br>RSV<br>35115<br>(83%) | P-<br>value <sup>a</sup> | Total<br>20082<br>(100%)                  | RSV<br>2557<br>(12.7%)  | No<br>RSV<br>17525<br>(87.3%) | P-<br>value <sup>a</sup> | Total<br>57313<br>(100%)                 | RSV<br>3873<br>(6.8%)   | No<br>RSV<br>53440<br>(93.2%) | P-<br>value <sup>a</sup> |
| Male                                            | 24730<br>(58.3%)      | 4234<br>(59.5%)                           | 20406<br>(58.1%)       | 0.02                        | 11162<br>(55.6%)         | 1393<br>(54.5%)                           | 9769<br>(55.7%)         | 0.33                          | 29865<br>(52.1%)         | 2067<br>(53.4%)                          | 27798<br>(52.0%)        | 0.26                          |                          |
| Age, years<br>median, (IQR)                     | 0.6<br>(0.3,<br>1.2)  | 0.6<br>(0.2,<br>1.2)                      | 0.7<br>(0.3,<br>1.2)   | 0.55                        | 3.2<br>(2.5,<br>4.0)     | 3.0<br>(2.4,<br>3.9)                      | 3.2<br>(2.5,<br>4.0)    | <0.001                        | 12.8 (8.8,<br>15.6)      | 11.3<br>(7.6,<br>14.9)                   | 12.9<br>(8.9,<br>15.6)  | < 0.001                       |                          |
| Weight, kg,<br>median, (IQR)                    | 7.7<br>(5.2,<br>10.0) | 7.8<br>(5.4,<br>10.0)                     | 7.7<br>(5.2,<br>10.0)  | 0.02                        | 14.5<br>(12.6,<br>16.8)  | 14.2<br>(12.3,<br>16.5)                   | 14.6<br>(12.6,<br>16.9) | <0.001                        | 45.0<br>(28.1,<br>62.5)  | 36.6<br>(24.7,<br>57.9)                  | 45.5<br>(28.5,<br>62.8) | <0.001                        |                          |
| <b>Primary Insurance</b>                        |                       |                                           |                        |                             |                          |                                           |                         |                               |                          |                                          |                         |                               |                          |
| Public                                          | 26379<br>(51.0%)      | 3742<br>(51.5%)                           | 17869<br>(50.9%)       | REF <sup>b</sup>            | 10207<br>(50.8%)         | 1294<br>(50.6%)                           | 8913<br>(50.9%)         | REF <sup>b</sup>              | 26379<br>(46.0%)         | 1975<br>(51.0%)                          | 24404<br>(45.7%)        | REF <sup>b</sup>              |                          |
| Private                                         | 14611<br>(21.7%)      | 1466<br>(20.2%)                           | 7740<br>(22.0%)        | 0.003 <sup>b</sup>          | 4474<br>(22.3%)          | 539<br>(21.1%)                            | 3935<br>(22.5%)         | 0.29 <sup>b</sup>             | 14611<br>(25.5%)         | 756<br>(19.5%)                           | 13855<br>(25.9%)        | <0.001 <sup>b</sup>           |                          |
| Other or<br>Unknown                             | 11570<br>(27.3%)      | 2064<br>(28.4%)                           | 9506<br>(27.1%)        | 0.23 <sup>b</sup>           | 5401<br>(26.9%)          | 724<br>(28.3%)                            | 4677<br>(26.7%)         | 0.20 <sup>b</sup>             | 16323<br>(28.4%)         | 1142<br>(29.5%)                          | 15181<br>(28.4%)        | 0.06 <sup>b</sup>             |                          |
| <b>Hospital Type</b>                            |                       |                                           |                        | 0.05                        |                          |                                           |                         | <0.001                        |                          |                                          |                         | <0.001                        |                          |
| Children's<br>Hospital                          | 21560<br>(50.9%)      | 3624<br>(49.8%)                           | 17936<br>(50.1%)       |                             | 11009<br>(54.8%)         | 1315<br>(51.4%)                           | 9694<br>(55.3%)         |                               | 28943<br>(50.5%)         | 2179<br>(56.3)                           | 26764<br>(50.1%)        |                               |                          |
| Not a<br>Children's<br>Hospital                 | 20827<br>(49.1%)      | 3648<br>(50.2%)                           | 17179<br>(48.9%)       |                             | 9073<br>(45.2%)          | 1242<br>(48.6%)                           | 7831<br>(44.7%)         |                               | 28370<br>(49.5%)         | 1694<br>(43.7%)                          | 26676<br>(49.9%)        |                               |                          |
| <b>ICU Length of Stay</b>                       |                       |                                           |                        | <0.001                      |                          |                                           |                         | <0.001                        |                          |                                          |                         | <0.001                        |                          |
| ICU days per<br>encounter,<br>median (IQR)      | 2.2<br>(1.1,<br>4.7)  | 2.8<br>(1.6,<br>5.8)                      | 2.0<br>(1.0,<br>4.4)   | <0.001                      | 1.7<br>(0.9,<br>3.7)     | 2.3<br>(1.3,<br>5.1)                      | 1.7<br>(0.9,<br>3.4)    | <0.001                        | 1.6 (0.9,<br>3.4)        | 3.3 (1.6,<br>8.0)                        | 1.6 (0.9,<br>3.2)       | <0.001                        |                          |
| Sum of ICU<br>days                              | 226270<br>(100%)      | 56491<br>(25.0%)                          | 169779<br>(75.0%)      |                             | 79330<br>(100%)          | 17152<br>(21.6%)                          | 62178<br>(78.4%)        |                               | 212178<br>(100%)         | 35691<br>(16.8%)                         | 176488<br>(83.2%)       |                               |                          |
| <b>Hospital Length of Stay</b>                  |                       |                                           |                        | <0.001                      |                          |                                           |                         | <0.001                        |                          |                                          |                         | <0.001                        |                          |
| Hospital days<br>per encounter,<br>median (IQR) | 4.1<br>(2.3,<br>8.0)  | 5.1<br>(3.0,<br>10.3)                     | 3.9<br>(2.2,<br>7.6)   | <0.001                      | 3.3<br>(1.9,<br>6.9)     | 4.6<br>(2.7,<br>10.5)                     | 3.2<br>(1.8,<br>6.3)    | <0.001                        | 3.5 (2.0,<br>7.1)        | 7.1 (3.6,<br>17.2)                       | 3.4 (1.9,<br>6.7)       | <0.001                        |                          |
| Sum of hospital<br>days                         | 367431<br>(100%)      | 90331<br>(24.6%)                          | 277100<br>(75.4%)      |                             | 141369<br>(100%)         | 30921<br>(21.9%)                          | 110448<br>(78.1%)       |                               | 421292<br>(100%)         | 68156<br>(16.2%)                         | 353136<br>(83.8%)       |                               |                          |
| <b>Illness Severity</b>                         |                       |                                           |                        | <0.001                      |                          |                                           |                         | <0.001                        |                          |                                          |                         | <0.001                        |                          |
| N (%)<br>Respiratory<br>Failure                 | 21392<br>(50.5%)      | 5675<br>(78.0%)                           | 15717<br>(44.8%)       | <0.001                      | 8402<br>(41.8%)          | 1871<br>(73.2%)                           | 6531<br>(37.3%)         | <0.001                        | 14406<br>(25.1%)         | 2177<br>(56.2%)                          | 12229<br>(22.9%)        | <0.001                        |                          |

|                                            |                  |                 |                 |        |                 |                |                 |        |                  |                 |                  |        |
|--------------------------------------------|------------------|-----------------|-----------------|--------|-----------------|----------------|-----------------|--------|------------------|-----------------|------------------|--------|
| Positive Pressure Ventilation <sup>c</sup> | 8996<br>(21.2%)  | 2013<br>(27.7%) | 6983<br>(19.9%) | <0.001 | 4016<br>(20.0%) | 739<br>(28.9%) | 3277<br>(18.7%) | <0.001 | 9883<br>(17.2%)  | 1322<br>(34.1%) | 8561<br>(16.0%)  | <0.001 |
| Vasoactive Medication                      | 7158<br>(16.9%)  | 1269<br>(17.5%) | 5889<br>(16.8%) | 0.16   | 3169<br>(15.8%) | 522<br>(20.4%) | 2647<br>(15.1%) | <0.001 | 11300<br>(19.7%) | 1266<br>(32.7%) | 10034<br>(18.8%) | <0.001 |
| ECMO                                       | 196<br>(0.5%)    | 60<br>(0.8%)    | 136<br>(0.4%)   | <0.001 | 45<br>(0.2%)    | 19<br>(0.7%)   | 26<br>(0.2%)    | <0.001 | 146<br>(0.3%)    | 45<br>(1.2%)    | 101<br>(0.2%)    | <0.001 |
| Death                                      | 1712<br>(4.0%)   | 251<br>(3.5%)   | 1461<br>(4.2%)  | 0.005  | 1066<br>(5.3%)  | 149<br>(5.8%)  | 917<br>(5.2%)   | 0.21   | 3076<br>(5.4%)   | 335<br>(8.7%)   | 2741<br>(5.1%)   | <0.001 |
| <b>High-Risk Condition<sup>d</sup></b>     | 10888<br>(25.7%) | 1371<br>(18.8%) | 9517<br>(27.1%) | <0.001 | 3779<br>(18.8%) | 428<br>(16.7%) | 3351<br>(19.1%) | 0.004  | 8195<br>(14.3%)  | 762<br>(19.7%)  | 7433<br>(13.9%)  | <0.001 |
| <b>High-Risk Condition<sup>d</sup></b>     |                  |                 |                 |        |                 |                |                 |        |                  |                 |                  |        |
| Chronic respiratory failure                | 1055<br>(2.5%)   | 129<br>(1.8%)   | 926<br>(2.6%)   | <0.001 | 726<br>(3.6%)   | 77<br>(3.0%)   | 649<br>(3.7%)   | 0.08   | 1655<br>(2.9%)   | 182<br>(4.7%)   | 1473<br>(2.8%)   | <0.001 |
| Perinatal respiratory disease              | 77<br>(0.2%)     | 9<br>(0.1%)     | 68<br>(0.2%)    | 0.20   | 38<br>(0.2%)    | 1<br>(0.0%)    | 37<br>(0.2%)    | 0.03   | 25 (0.0%)        | 0<br>(0.0%)     | 25<br>(0.1%)     | 0.06   |
| Congenital heart disease                   | 8209<br>(19.4%)  | 915<br>(12.6%)  | 7294<br>(20.8%) | <0.001 | 2326<br>(11.6%) | 215<br>(8.4%)  | 2111<br>(12.1%) | <0.001 | 3643<br>(6.4%)   | 206<br>(5.3%)   | 3437<br>(6.4%)   | 0.006  |
| Prematurity                                | 2548<br>(6.0%)   | 391<br>(5.4%)   | 2157<br>(6.1%)  | 0.01   | 514<br>(2.6%)   | 68<br>(2.7%)   | 446<br>(2.5%)   | 0.73   | 356<br>(0.6%)    | 34<br>(0.9%)    | 322<br>(0.6%)    | 0.04   |
| Immunodeficiency                           | 597<br>(1.4%)    | 150<br>(2.1%)   | 447<br>(1.3%)   | <0.001 | 534<br>(2.7%)   | 110<br>(4.3%)  | 424<br>(2.4%)   | <0.001 | 1617<br>(2.8%)   | 301<br>(7.8%)   | 1316<br>(2.5%)   | <0.001 |
| Muscular Dystrophy                         | 23<br>(0.1%)     | 8<br>(0.1%)     | 15<br>(0.0%)    | 0.025  | 28<br>(0.1%)    | 5<br>(0.2%)    | 23<br>(0.1%)    | 0.42   | 240<br>(0.4%)    | 15<br>(0.4%)    | 225<br>(0.4%)    | 0.75   |
| Cystic Fibrosis                            | 61<br>(0.1%)     | 10<br>(0.1%)    | 51<br>(0.2%)    | 0.87   | 27<br>(0.1%)    | 6<br>(0.2%)    | 21<br>(0.1%)    | 0.14   | 168<br>(0.3%)    | 13<br>(0.3%)    | 155<br>(0.3%)    | 0.61   |
| Neuromuscular scoliosis                    | 13<br>(0.0%)     | 4<br>(0.1%)     | 9<br>(0.0%)     | 0.19   | 56<br>(0.3%)    | 3<br>(0.1%)    | 53<br>(0.3%)    | 0.10   | 1453<br>(2.5%)   | 106<br>(2.7%)   | 1347<br>(2.5%)   | 0.41   |



**eTable 11:** Demographics and Outcomes for all Pediatric ICU Encounters with RSV between January 1st, 2017, and June 1st, 2023, Stratified by Positive Pressure Ventilation and Age

- a. Patients under 1 year on admission and patients under two years on admission with a high-risk condition were considered eligible for RSV prevention.<sup>2</sup>
- b. High-risk conditions were identified by ICD codes selected based on CDC's recommendations for nirsevimab administration.<sup>2</sup>

| RSV Infection N (% age group)       |                                           |                   |                   |                   |
|-------------------------------------|-------------------------------------------|-------------------|-------------------|-------------------|
|                                     | Variables                                 | Total             | PPV               | No PPV            |
|                                     |                                           | 13702 (100%)      | 4074 (29.7%)      | 9628 (70.3%)      |
| 0-1 Years on Admission <sup>a</sup> | All encounters                            | 4865 (100%)       | 1358 (27.9%)      | 3507 (72.1%)      |
|                                     | Age, years median, (IQR)                  | 0.4 (0.2, 0.6)    | 0.3 (0.1, 0.6)    | 0.4 (0.2, 0.7)    |
|                                     | Weight, kg, median, (IQR)                 | 6.2 (4.6, 8.0)    | 5.7 (4.2, 7.8)    | 6.4 (4.8, 8.2)    |
|                                     | Public Insurance                          | 2515 (51.7%)      | 799 (58.8%)       | 1716 (48.9%)      |
|                                     | High-Risk Condition                       | 1019 (20.9%)      | 446 (32.8%)       | 573 (16.3%)       |
|                                     | ICU days per encounter, median (IQR)      | 3.1 (1.8, 6.5)    | 6.7 (3.0, 14.8)   | 2.6 (1.6, 4.5)    |
|                                     | Hospital days per encounter, median (IQR) | 5.8 (3.5, 11.4)   | 10.7 (5.2, 23.6)  | 4.9 (3.1, 8.3)    |
|                                     | Death                                     | 145 (3.0%)        | 85 (6.3%)         | 60 (1.7%)         |
| 1-2 Years on Admission <sup>a</sup> | All encounters                            | 2407 (100%)       | 655 (27.2%)       | 1752 (72.8%)      |
|                                     | Age, years median, (IQR)                  | 1.4 (1.2, 1.7)    | 1.4 (1.2, 1.7)    | 1.4 (1.2, 1.7)    |
|                                     | Weight, kg, median, (IQR)                 | 10.5 (9.4, 11.8)  | 10.5 (9.2, 11.8)  | 10.5 (9.4, 11.8)  |
|                                     | Public Insurance                          | 1227 (51.0%)      | 346 (52.8%)       | 881 (50.3%)       |
|                                     | High-Risk Condition <sup>b</sup>          | 352 (14.6%)       | 143 (21.8%)       | 209 (11.9%)       |
|                                     | ICU days per encounter, median (IQR)      | 2.2 (1.4, 4.4)    | 3.5 (1.8, 11.8)   | 2.0 (1.3, 3.6)    |
|                                     | Hospital days per encounter, median (IQR) | 4.0 (2.6, 8.2)    | 5.9 (2.9, 19.6)   | 3.8 (2.4, 6.7)    |
|                                     | Death                                     | 106 (4.4%)        | 60 (9.2%)         | 46 (2.6%)         |
| 2-5 Years on Admission              | All encounters                            | 2557 (100%)       | 739 (28.9%)       | 1818 (71.1%)      |
|                                     | Age, years median, (IQR)                  | 3.1 (2.4, 3.9)    | 3.1 (2.5, 3.9)    | 3.0 (2.4, 3.9)    |
|                                     | Weight, kg, median, (IQR)                 | 14.2 (12.3, 16.5) | 14.4 (12.3, 16.8) | 14.2 (12.3, 16.4) |
|                                     | Public Insurance                          | 1294 (50.6%)      | 429 (58.1%)       | 865 (47.6%)       |
|                                     | High-Risk Condition                       | 428 (16.7%)       | 183 (24.8%)       | 245 (13.5%)       |
|                                     | ICU days per encounter, median (IQR)      | 2.3 (1.3, 5.1)    | 3.9 (1.7, 11.8)   | 2.0 (1.2, 3.9)    |
|                                     | Hospital days per encounter, median (IQR) | 4.6 (2.7, 10.5)   | 6.8 (3.1, 19.1)   | 4.1 (2.6, 8.2)    |
|                                     | Death                                     | 149 (5.8%)        | 77 (10.4%)        | 72 (4.0%)         |
| >5 years on admission               | All encounters                            | 3873 (100%)       | 1322 (34.1%)      | 2551 (65.9%)      |
|                                     | Age, years median, (IQR)                  | 11.3 (7.6, 14.9)  | 11.5 (7.8, 14.8)  | 11.3 (7.6, 15.0)  |
|                                     | Weight, kg, median, (IQR)                 | 36.6 (24.7, 57.9) | 35.0 (24.5, 55.0) | 37.5 (24.8, 58.9) |
|                                     | Public Insurance                          | 1975 (51.0%)      | 756 (57.2%)       | 1219 (47.8%)      |
|                                     | High-Risk Condition                       | 762 (19.7%)       | 394 (29.8%)       | 368 (14.4%)       |
|                                     | ICU days per encounter, median (IQR)      | 3.3 (1.6, 8.0)    | 7.1 (2.8, 18.0)   | 2.5 (1.3, 4.9)    |
|                                     | Hospital days per encounter, median (IQR) | 7.1 (3.6, 17.2)   | 12.7 (5.6, 31.9)  | 5.5 (3.0, 11.6)   |
|                                     | Death                                     | 335 (8.6%)        | 201 (15.2%)       | 134 (5.3%)        |

**eFigure:** Number of Encounters in Each United States Zip Code Region

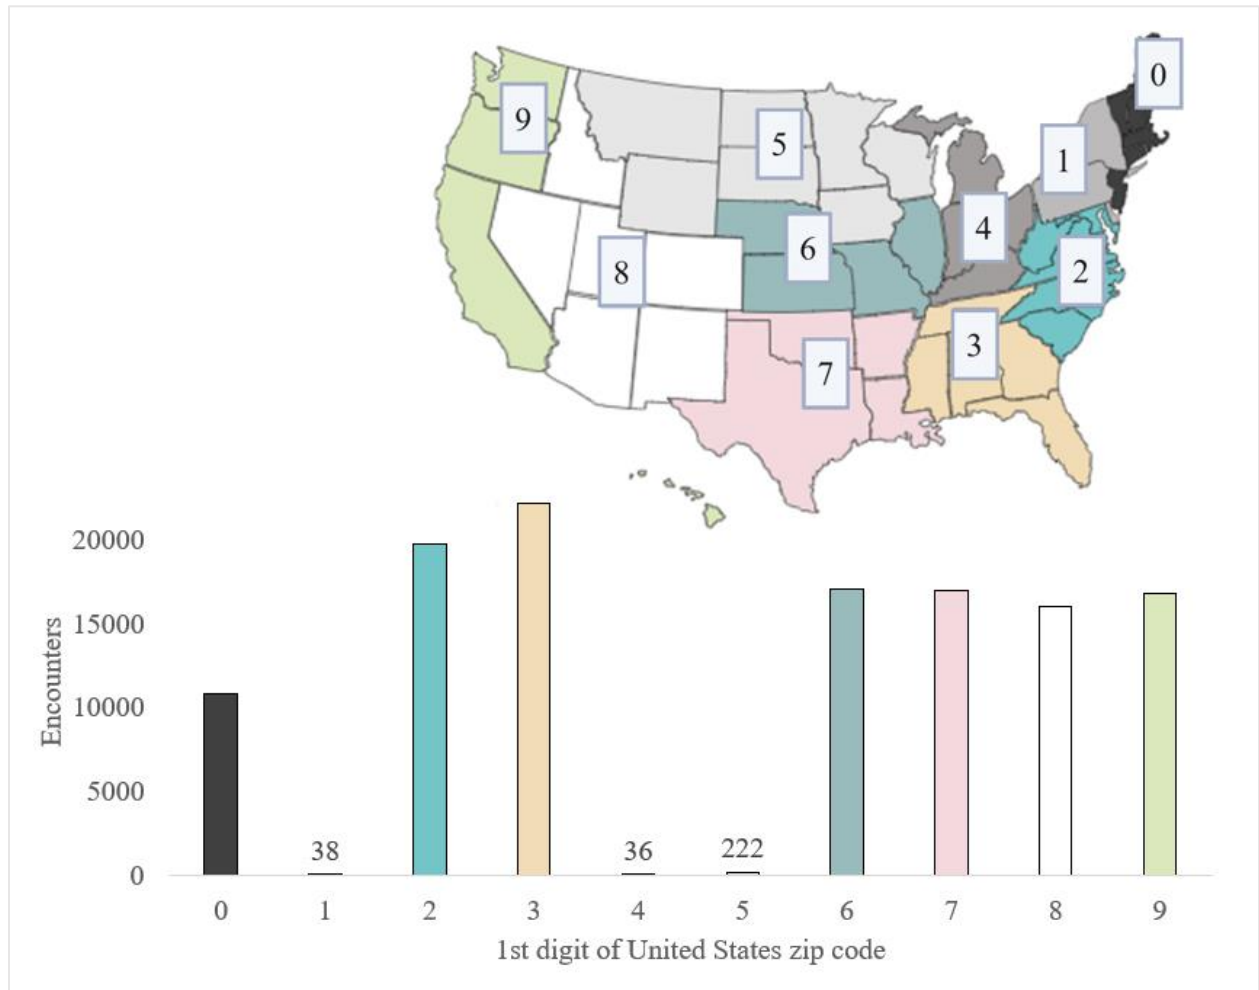

**eReferences:**

1. Obando-Pacheco P, Justicia-Grande AJ, Rivero-Calle I, et al. Respiratory Syncytial Virus Seasonality: A Global Overview. *J Infect Dis*. 2018;217(9):1356-1364. doi:10.1093/infdis/jiy056
2. CDC Health Alert Network. Limited Availability of Nirsevimab in the United States—Interim CDC Recommendations to Protect Infants from Respiratory Syncytial Virus (RSV) during the 2023–2024 Respiratory Virus Season. emergency.cdc.gov.
3. Drysdale SB, Cathie K, Flamein F, et al. Nirsevimab for Prevention of Hospitalizations Due to RSV in Infants. *New England Journal of Medicine*. 2023;389(26):2425-2435. doi:10.1056/NEJMoa2309189
4. Chanapa Tantibanchachai. FDA Approves New Drug to Prevent RSV in Babies and Toddlers. FDA.gov/news.
5. Kampmann B, Madhi SA, Munjal I, et al. Bivalent Prefusion F Vaccine in Pregnancy to Prevent RSV Illness in Infants. *New England Journal of Medicine*. 2023;388(16):1451-1464. doi:10.1056/NEJMoa2216480
6. Hammitt LL, Dagan R, Yuan Y, et al. Nirsevimab for Prevention of RSV in Healthy Late-Preterm and Term Infants. *New England Journal of Medicine*. 2022;386(9):837-846. doi:10.1056/NEJMoa2110275
7. Pelletier JH, Rakkar J, Au AK, Fuhrman D, Clark RSB, Horvat CM. Trends in US Pediatric Hospital Admissions in 2020 Compared With the Decade Before the COVID-19 Pandemic. *JAMA Netw Open*. 2021;4(2):e2037227. doi:10.1001/jamanetworkopen.2020.37227
8. Wang L, Berger N, Davis PB, Kaelber DC, Volkow N, Xu R. Time trend and seasonality in medically attended respiratory syncytial virus (RSV) infections in US children aged 0–5 years, January 2010–January 2023. *Fam Med Community Health*. 2023;11(4):e002453. doi:10.1136/fmch-2023-002453
