# Supplementary material for: Respiratory Syncytial Virus and US Pediatric Intensive Care Utilization
Source: PubMed Central journal article supplement (PMC11581606; doi:10.1001/jamanetworkopen.2024.40997), 2024-10-25
Supplement: jamanetwopen-e2440997-s002.pdf [file jamanetwopen-e2440997-s002.pdf]

## Data Sharing Statement

Shanklin. Respiratory Syncytial Virus and United States Pediatric Intensive Care Utilization. *JAMA Netw Open*. Published October 25, 2024. doi:10.1001/jamanetworkopen.2024.40997

### Data

**Data available:** No

### Additional Information

**Explanation for why data not available:** Data is owned by Oracle-Cerner Real World Data and cannot be made available.
